# Supplementary material for: A single-progenitor model as the unifying paradigm of epidermal and esophageal epithelial maintenance in mice
Source: PubMed Central journal article supplement (PMC7080751; doi:10.1038/s41467-020-15258-0), 2020-03-18
Supplement: 41467_2020_15258_MOESM1_ESM.pdf [file 41467_2020_15258_MOESM1_ESM.pdf]

**Title: Supplementary Data 1:**

**Description:** Frequency of Histone-GFP retaining cells at 18 day time point (back skin 14 days) in histone-GFP dilution assay in R26M2rtTA/TetO-H2BGFP mice. CD45+ cells are leukocytes.

**Title: Supplementary Data 2:**

**Description:** Quantification of Histone-GFP dilution in esophagus and epidermis of R26M2rtTA/TetO-H2BGFP mice.

**Title: Supplementary Data 3:**

**Description:** Tests of unimodality of Histone-GFP distribution in Histone-GFP dilution in esophagus and epidermis of R26M2rtTA/TetO-H2BGFP mice.

**Title: Supplementary Data 4:**

**Description:** Parameter values used in simulations of model fits to experimental data and goodness of fit statistics.

**Title: Supplementary Data 5:**

**Description:** Lineage tracing data from *Lrig1-eGFP-cre<sup>ERT</sup> R26<sup>flConfetti</sup>* mice. Labelled clone sizes in murine esophageal epithelium at different times post-induction (number of basal-layer cells and total cells per labelled clone).

**Title: Supplementary Movie 1.**

**Description:** Orthogonal views of a rendered confocal Z stack of a typical esophageal epithelium wholemount from a *Rosa26<sup>M2rtTA</sup> TetO-H2BGFP* mouse immediately after doxycycline induction (0 time point). Main panel is top down (x-y) view, small panels show side (x-z and y-z) views. Green: H2B-GFP; blue: DAPI. The video transits from deepest, basal plane to outermost suprabasal layers.

**Title: Supplementary Movie 2.**

**Description:** Orthogonal views of a rendered confocal Z stack of a typical ear epidermis wholemount from a *Rosa26<sup>M2rtTA</sup> TetO-H2BGFP* mouse immediately after doxycycline induction (0 time point). Main panel is top down (x-y) view, small panels show side (x-z and y-z) views. Green: H2B-GFP; blue: DAPI. The video transits from deepest, basal plane to outermost suprabasal layers.

**Title: Supplementary Movie 3.**

**Description:** Orthogonal views of a rendered confocal Z stack of a typical tail epidermis wholemount from a *Rosa26<sup>M2rtTA</sup> TetO-H2BGFP* mouse immediately after doxycycline induction (0 time point). Main panel is top down (x-y) view, small panels show side (x-z and y-z) views. Green: H2B-GFP; blue: DAPI; white: KRT14. The video transits from deepest, basal plane to outermost suprabasal layers. A scale plate (most apical, blister-shaped region) is located in the middle of the image, surrounded by deeper interscale regions and hair follicle openings (brightest H2BGFP intensity).

**Title: Supplementary Movie 4.**

**Description:** Orthogonal views of a rendered confocal Z stack of a typical dorsum epidermis wholemount from a *Rosa26<sup>M2rtTA</sup> TetO-H2BGFP* mouse immediately after doxycycline induction (0 time point). Main panel is top down (x-y) view, small panels show side (x-z and y-z) views. Green: H2B-GFP. The video transits from deepest, basal plane to outermost suprabasal layers.
